# Supplementary material
Source: PubMed Central journal article supplement (PMC8991438)
Supplement: NIHMS1785926-supplement-Table_of_Materials.pdf [file NIHMS1785926-supplement-Table_of_Materials.pdf]

Materials List for

# Inherent Dynamics Visualizer, an Interactive Application for Evaluating and Visualizing Outputs from a Gene Regulatory Network Inference Pipeline

Robert C. Moseley<sup>1</sup>, Sophia Campione<sup>1</sup>, Bree Cummins<sup>2</sup>, Francis Motta<sup>3</sup>, Steven B. Haase<sup>1</sup>

<sup>1</sup>Department of Biology, Duke University <sup>2</sup>Department of Mathematical Sciences, Montana State University <sup>3</sup>Department of Mathematical Sciences, Florida Atlantic University

## Corresponding Author

**Robert C. Moseley**  
robert.moseley@duke.edu

## Citation

Moseley, R.C., Campione, S., Cummins, B., Motta, F., Haase, S.B. Inherent Dynamics Visualizer, an Interactive Application for Evaluating and Visualizing Outputs from a Gene Regulatory Network Inference Pipeline. *J. Vis. Exp.* (), e63084, doi:10.3791/63084 (2021).

## Date Published

December 7, 2021

## DOI

10.3791/63084

## URL

jove.com/video/63084

## Materials

| Name                         | Company | Catalog Number | Comments                                                                                                                              |
|------------------------------|---------|----------------|---------------------------------------------------------------------------------------------------------------------------------------|
| Docker                       |         |                | <a href="https://docs.docker.com/get-docker/">https://docs.docker.com/get-docker/</a>                                                 |
| Git                          |         |                | <a href="https://git-scm.com/">https://git-scm.com/</a>                                                                               |
| Inherent Dynamics Pipeline   |         |                | <a href="https://gitlab.com/biochron/inherent_dynamics_pipeline">https://gitlab.com/biochron/inherent_dynamics_pipeline</a>           |
| Inherent Dynamics Visualizer |         |                | <a href="https://gitlab.com/bertfordley/inherent_dynamics_visualizer">https://gitlab.com/bertfordley/inherent_dynamics_visualizer</a> |
| Miniconda                    |         |                | <a href="https://docs.conda.io/en/latest/miniconda.html">https://docs.conda.io/en/latest/miniconda.html</a>                           |
| Pip                          |         |                | <a href="https://pip.pypa.io/en/stable/">https://pip.pypa.io/en/stable/</a>                                                           |
